# Supplementary material for: Reversible ice sheet thinning in the Amundsen Sea Embayment during the Late Holocene
Source: Copernicus journal article supplement (doi:10.5194/tc-2022-172), 2022-09-14
Supplement: Supplementary file 1 [file S1_Core_site_sample_and_rock_density.xlsx]

## Sheet: Core site information
Sheet 1: Kay Peak subglacial bedrock core locations and ice thicknesses
			Ice surface	Bedrock surface	Total ice and firn	Basal dirty	Total mass depth	Length of core
Core ID	Latitude (DD)	Longitude (DD)	elevation (m)	elevation (m)	thickness (m)	ice thickness (m)	to bedrock (g cm-2)	recovered (cm)	Online documentation	Core photograph
19-KP-H1	-75.2153	-110.96	120	84.2	35.8	0.67	2698	114	http://antarctica.ice-d.org/core/19-KP-H1	https://storage.googleapis.com/ice-d-antarctica/photos/kaypeak_2019_20/lab/19-KP-H1-full-core.png
19-KP-H4	-75.2152	-110.96	119.4	80	39.4	0.96	2992	137	http://antarctica.ice-d.org/core/19-KP-H4	https://storage.googleapis.com/ice-d-antarctica/photos/kaypeak_2019_20/lab/19-KP-H4-full-core.png
19-KP-H5	-75.2151	-110.96	118.7	77.8	40.9	0.37	3029	128	http://antarctica.ice-d.org/core/19-KP-H5	https://storage.googleapis.com/ice-d-antarctica/photos/kaypeak_2019_20/lab/19-KP-H5-full-core.png
19-KP-H6	-75.2153	-110.96	120.7	84.4	36.3	1.17	2750	n/a	http://antarctica.ice-d.org/core/19-KP-H6	https://storage.googleapis.com/ice-d-antarctica/photos/kaypeak_2019_20/lab/19KPH6_202007090059.jpg
Notes:
1. Ice surface elevations measured by differentially corrected GPS against a temporary base station on Kay Peak Ridge.
2. Mass depths to bedrock derived from field measurements of ice and firn density during drilling.
3. Core 19-KP-H6 recovered rock fragments with the same lithology as bedrock, but it was not possible to determine whether the fragments were from the bedrock surface or a loose clast in the basal ice.

## Sheet: Surface sample information
Sheet 2: Site and sample information for bedrock exposure-dating samples collected from the ice-free portion of Kay Peak Ridge
						Topographic
Sample name	Latitude (DD)	Longitude (DD)	Elevation (m)	Thickness (cm)	Density (g cm-3)	shielding	Lithology	Date collected	Online documentation
1. New bedrock samples from Kay Peak Ridge collected in this study
19-KP-001-BR	-75.2164	-110.962	140	8.2	2.7	0.9964	Biotite gneiss	2020-01-10	http://antarctica.ice-d.org/sample/19-KP-001-BR
19-KP-002-BR	-75.2165	-110.963	147	8.2	2.7	0.9964	Biotite gneiss	2020-01-10	http://antarctica.ice-d.org/sample/19-KP-002-BR
19-KP-003-BR	-75.2166	-110.963	151	8.2	2.7	0.9964	Biotite gneiss	2020-01-10	http://antarctica.ice-d.org/sample/19-KP-003-BR
19-KP-004-BR	-75.2163	-110.963	161	5.6	2.7	0.9951	Biotite gneiss	2020-01-10	http://antarctica.ice-d.org/sample/19-KP-004-BR
19-KP-005-BR	-75.2167	-110.963	165	7	2.7	0.9951	Biotite gneiss	2020-01-10	http://antarctica.ice-d.org/sample/19-KP-005-BR
19-KP-006-BR	-75.2169	-110.963	181	5.3	2.7	0.9951	Biotite gneiss	2020-01-10	http://antarctica.ice-d.org/sample/19-KP-006-BR
19-KP-007-BR	-75.218	-110.962	209	3.4	2.7	0.9933	Biotite gneiss	2020-01-10	http://antarctica.ice-d.org/sample/19-KP-007-BR
19-KP-008-BR	-75.2181	-110.962	223	6.4	2.7	0.9933	Biotite gneiss	2020-01-10	http://antarctica.ice-d.org/sample/19-KP-008-BR
19-KP-009-BR	-75.2185	-110.961	236	6.1	2.7	0.993	Biotite gneiss	2020-01-10	http://antarctica.ice-d.org/sample/19-KP-009-BR
19-KP-010-BR	-75.2188	-110.961	248	3.2	2.7	0.9936	Biotite gneiss	2020-01-10	http://antarctica.ice-d.org/sample/19-KP-010-BR
19-KP-011-BR	-75.2193	-110.959	281	4.9	2.7	0.9936	Biotite gneiss	2020-01-10	http://antarctica.ice-d.org/sample/19-KP-011-BR
19-KP-012-BR	-75.2208	-110.959	338	5.9	2.7	0.9996	Granitic aplite dike	2020-01-10	http://antarctica.ice-d.org/sample/19-KP-012-BR
2. Previously published (Johnson et al., 2020) with C-14 exposure ages recalculated in this study
KAY-101	-75.2206	-110.96	334	3.47	2.7	0.9993	gneiss	2016-01-06	http://antarctica.ice-d.org/sample/JJ2015-KAY-101
KAY-103	-75.2196	-110.959	301.819	1.9999	2.7	0.9975	aplite	2016-01-06	http://antarctica.ice-d.org/sample/JJ2015-KAY-103
KAY-105	-75.2165	-110.963	149.832	1.9999	2.7	0.9933	granite	2016-01-06	http://antarctica.ice-d.org/sample/JJ2015-KAY-105
KAY-107	-75.2167	-110.963	160.012	3.21	2.7	0.9961	gneiss	2016-01-06	http://antarctica.ice-d.org/sample/JJ2015-KAY-107
KAY-108	-75.2169	-110.963	166.62	4.27	2.7	0.9942	gneiss	2016-01-07	http://antarctica.ice-d.org/sample/JJ2015-KAY-108
KAY-109	-75.217	-110.963	170.415	1.9999	2.7	0.9972	gneiss	2016-01-07	http://antarctica.ice-d.org/sample/JJ2015-KAY-109
KAY-110	-75.2168	-110.963	161.363	1.9999	2.7	0.9967	gneiss	2016-01-07	http://antarctica.ice-d.org/sample/JJ2015-KAY-110
KAY-111	-75.2166	-110.963	153.646	1.9999	2.7	0.9941	gneiss	2016-01-07	http://antarctica.ice-d.org/sample/JJ2015-KAY-111
Notes:
1. Locations of 2020 samples were determined by handheld GPS.
2. Elevations of 2020 samples were determined by barometric traverse from a temporary DGPS base station located at the site of 19-KP-004-BR (161 m). Estimated uncertainty ± 2 m.
3. Topographic shielding for 2020 samples measured by approximating the horizon geometry with a handheld compass and inclinometer. Shielding factor calculation is in Balco et al. (2008).

## Sheet: Rock density measurements
Sheet 3: Rock density measurements on Kay Peak subglacial bedrock core samples
	Density measured
Sample name	by immersion weighing
	(g cm-3)
19-KP-H1-7-17	2.76
19-KP-H1-17-27	2.71
19-KP-H1-48-58	2.71
19-KP-H1-68-78	2.69
19-KP-H1-88-95	2.72
19-KP-H4-17-27	2.67
19-KP-H4-27-37	2.71
19-KP-H4-58-68	2.78
19-KP-H4-68-78	2.81
19-KP-H4-88-98	2.76
19-KP-H4-128-137	2.77
19-KP-H5-20-30	2.76
19-KP-H5-81-91	2.79
19-KP-H5-91-101	2.83
19-KP-H5-101-111	2.81
19-KP-H5-112-120	2.78
19-KP-H5-120-128	2.95
Mean	2.76529
Standard deviation	0.0658709
Note: all samples are biotite gneiss of Kay Peak Ridge.
