# Supplementary material for: Reversible ice sheet thinning in the Amundsen Sea Embayment during the Late Holocene
Source: Copernicus journal article supplement (doi:10.5194/tc-2022-172), 2022-09-14
Supplement: Supplementary file 2 [file S2_IRSL.xlsx]

## Sheet: Sheet1
Sheet 1 Depth beneath surface and corresponding sensitivity-corrected intensities of natural luminescence signals (LN/TN) for all rock slices of 19-KP-H1. Each LN/TN value (± 1σ) represents three aliquots.
19-KP-H1
Slice count	Min depth (mm)	Max depth (mm)	LN/TN IR50	1σ	LN/TN pIRIR225	1σ
1*	0	3.15	2.133	0.06	4.049	0.155
2	3.53	4.93	2.514	0.196	4.37	0.903
3	5.31	6.31	2.306	0.152	4.797	1.359
4*	6.69	7.99	2.343	0.138	4.114	0.202
5*	8.37	9.57	2.512	0.394	4.005	0.212
6	9.87	12.47	2.455	0.145	4.152	0.351
7	12.77	13.87	2.388	0.251	4.657	0.202
8	14.17	15.87	2.476	0.293	4.259	0.093
9	16.17	17.47	2.424	0.159	4.171	0.477
10	17.77	19.17	2.578	0.282	5.124	0.749
11	19.47	20.67	2.619	0.19	4.512	0.437
12	20.97	23.47	2.594	0.106	4.951	0.411
13	23.77	24.77	2.633	0.108	5.387	1.474
14	25.07	26.37	2.672	0.127	5.029	0.749
15	26.67	28.17	2.626	0.209	5.069	0.566
16	28.47	29.67	2.619	0.082	5.392	1.121
17	29.97	31.57	2.84	0.798	5.479	0.288
18*	31.87	33.07	2.54	0.208	5.169	0.501
19*	33.37	34.67	2.549	0.114	5.513	1.01
20	34.97	36.27	2.865	0.07	4.548	0.191
21*	36.57	41.57	2.532	0.155	5.098	0.105
*Slice measured for equivalent dose, dose response and fading characteristics.

## Sheet: Sheet2
Sheet 2: Depth beneath surface and corresponding sensitivity-corrected intensities of natural luminescence signals (LN/TN) for all rock slices of 19-KP-H4. Each LN/TN value (± 1σ) represents three aliquots.
19-KP-H4
Slice count	Min depth (mm)	Max depth (mm)	LN/TN IR50	1σ	LN/TN pIRIR225	1σ
1	0	1.2	1.892	0.166	2.129	0.736
2	1.58	2.98	1.798	0.412	2.863	0.692
3	3.36	4.56	3.097	0.592	3.721	1.124
4	4.94	6.24	2.91	0.608	2.962	0.785
5	6.62	8.02	3.56	0.668	3.454	0.07
6	8.4	9.6	2.926	0.464	3.147	0.513
7	9.98	11.18	2.772	0.12	3.014	0.534
8	11.56	13.16	3.266	0.183	3.133	0.301
9	13.56	14.04	3.356	0.167	4.006	0.251
10	14.42	16.02	2.914	0.06	3.27	0.651
11	16.4	18.7	3.319	0.61	3.361	0.443
12	19.08	26.88	3.579	0.437	3.446	0.34
13	26.88	46.58	3.709	0.244	4.198	0.33

## Sheet: Sheet3
Sheet 3: Depth beneath surface and corresponding sensitivity-corrected intensities of natural luminescence signals (LN/TN) for all rock slices of KAY-110. Each LN/TN value (± 1σ) represents three aliquots. The bottom two slices show evidence of bleaching from the side (Fig. S1) and are excluded from analysis.
KAY-110
Slice count	Min depth (mm)	Max depth (mm)	LN/TN IR50	1σ	LN/TN pIRIR225	1σ
1	0	1.9	0.236	0.114	1.838	0.901
2	2.28	3.48	0.271	0.069	2.753	0.744
3	3.86	5.26	0.519	0.43	3.333	1.462
4	5.64	6.74	1.046	1.016	4.819	1.791
5	7.12	8.52	1.259	0.766	5.778	0.664
6	8.9	10.4	3.191	1.083	6.783	0.495
7	10.78	12.58	3.738	0.636	6.128	2.422
8	12.96	14.06	3.012	0.788	5.123	1.676
9	14.44	15.94	3.882	1.56	5.974	1.394
10	16.32	17.62	2.998	0.436	5.278	2.296
11	18	19.3	3.755	0.216	5.555	1.405
12	19.68	27.28	1.605	0.118	4.401	1.372
13	27.66	29.53	1.037	0.597	2.401	1.746

## Sheet: Sheet4
Sheet 4: Single aliquot regenerative (SAR) measurement protocol used in this study.
Step	Measurement
1. Regenerative dose*
2. Preheat to 250 °C for 100 s
3. IR diode stimulation at 50 °C for 100 s**	LX, IR50
4. IR diode stimulation at 225 °C for 100 s**	LX, pIRIR225
5. Test dose of 18.8 Gy
6. Preheat to 250 °C for 100 s
7. IR diode stimulation at 50 °C for 100 s**	TX, IR50
8. IR diode stimulation at 225 °C for 100 s**	TX, pIRIR225
9. IR diode stimulation at 290 °C for 100 s
*For the measurement of the natural luminescence intensity, LN/TN, no regenerative dose was given.
**Samples were held at the measurement temperature for 30 s prior to stimulation to avoid thermal lag between grains and the disc (Sohbati et al., 2018)

## Sheet: Sheet5
Sheet 5: Dosimetry measurements for core top samples.
Sample	Depth interval (cm)	U (ppm)	Th (ppm)	K (%)	Rb (ppm)	Infinite matrix dose rate (Gy/ka)*
19-KP-H1	6.0 – 7.0	0.35	8.32	1.51	73.7	4.832 ± 0.880
19-KP-H4	5.7 – 7.5	0.35	1.65	1.01	46.3	3.960 ± 0.880
*Calculated with DRAC online calculator (v1.2) (Durcan et al., 2015). See text for more details.
