# Supplementary material for: Reversible ice sheet thinning in the Amundsen Sea Embayment during the Late Holocene
Source: Copernicus journal article supplement (doi:10.5194/tc-2022-172), 2022-09-14
Supplement: Supplementary file 3 [file S3_26Al.xlsx]

## Sheet: Core Data
Sheet 1: Analytical data for Al-26 measurements on Kay Peak subglacial bedrock core samples
			Al Carrier	Al Carrier			Measured			Carrier dominates blank correction with weighted average and standard error in blank
	AMS	Batch	Mass	Concentration	Total Al	Quartz Mass	26Al/27Al	±	±	26Al	±	±
Sample ID	ID	Number	(g)	(ug Al/g)	(ug)	(g)	Ratio		%	[atoms/g of q]		[%]
H1-17-27	XAL0560	3	2.2247	1033.56	2635.28	18.397	1.4086e-14	8.90195e-16	0.0631972	43156.9	2860.46	6.62803
H1-48-58	XAL0561	3	2.3204	1033.56	2684.06	13.485	6.8145e-15	6.56017e-16	0.0962678	27612.8	2943.63	10.6604
H1-105-114R	XAL0562	3	2.2186	1033.56	2607.21	11.045	4.8348e-15	5.54146e-16	0.114616	22370.4	2959.71	13.2305
H1-27-37	XAL0569	4	2.2269	1033.56	2617.61	14.423	1.0097e-14	8.44636e-16	0.0836521	38508.2	3441.03	8.93583
H1-58-68	XAL0570	4	2.1173	1033.56	2627.19	13.055	6.6046e-15	9.19316e-16	0.139193	27157.1	4146.78	15.2696
H1-78-88	XAL0571	4	2.3147	1033.56	2631.51	9.44	5.1306e-15	6.16383e-16	0.120138	28134.5	3880.42	13.7924
H1-7-17	XAL0573	5	2.2269	1033.56	2600.11	16.328	1.2933e-14	1.78775e-15	0.138232	43850.1	6360.56	14.5052
H1-88-95	XAL0574	5	2.1231	1033.56	2378.84	10.197	5.4701e-15	6.22968e-16	0.113886	25265.8	3282.42	12.9916
H1-68-78	XAL0577	7	2.3363	1033.56	2638.21	13.547	5.6147e-15	6.3936e-16	0.113873	21740.5	2809.99	12.9251
H1-105-114	XAL0578	7	2.1268	1033.56	2536.55	14.331	4.6726e-15	8.6951e-16	0.186087	16167.3	3452.96	21.3578
H1-37-47	XAL0566	8	2.3442	1033.56	2568.58	11.171	7.8045e-15	1.02031e-15	0.130733	36806.8	5259.51	14.2895

## Sheet: Blanks
Sheet 2: Al-26 process blank data for the period during which Kay Peak samples were prepared at CosmIC.
			Carrier	Carrier			Measured
	AMS	Batch	Mass	Concentration	Total Al	Quartz Mass	26Al/27Al	±	±
Blank ID	ID	Number	(g)	(ug Al/g)	(ug)	(g)	Ratio		%
BLK260721A	XAL0558	3	2.5304	1033.56	2618.87	0	7.5073e-16	1.94009e-16	0.258427
BLK020821A	XAL0568	4	2.5164	1033.56	2510.92	0	7.473e-16	3.05232e-16	0.408446
BLK160821A	XAL0572	5	2.5339	1033.56	2621.51	0	1.5338e-15	6.2647e-16	0.408443
BLK310821A	XAL0576	7	2.5239	1033.56	2595.25	0	6.8333e-16	2.06163e-16	0.301704
BLK060921A	XAL0564	8	2.5394	1033.56	2615.68	0	4.4485e-16	1.98972e-16	0.447278

## Sheet: Field Replicates
Sheet 3: Analytical data for Al-26 measurements on field replicates of Kay Peak subglacial bedrock core samples
			Al Carrier	Al Carrier			Measured			Carrier dominates blank correction with weighted average and standard error in blank
	AMS	Batch	Mass	Concentration	Total Al	Quartz Mass	26Al/27Al	±	±	26Al	±	±
Sample ID	ID	Number	(g)	(ug Al/g)	(ug)	(g)	Ratio		%	[atoms/g of q]		[%]
H6-surface	XAL0559	3	2.3321	1033.56	2511.62	6.707	1.5548e-14	1.01116e-15	0.0650349	124552	8491.25	6.81745
H6-surfaceR	XAL0565	8	2.3348	1033.56	2485.85	6.617	1.4495e-14	1.03275e-15	0.0712489	116063	8699.5	7.49553

## Sheet: CRONUS A Data
Sheet 4: Analytical data for Al-26 measurements on CRONUS A reference material replicate samples
			Al Carrier	Al Carrier			Measured			Carrier dominates blank correction with weighted average and standard error in blank
	AMS	Batch	Mass	Concentration	Total Al	Quartz Mass	26Al/27Al	±	±	26Al	±	±
Sample ID	ID	Number	(g)	(ug Al/g)	(ug)	(g)	Ratio		%	[atoms/g of q]		[%]
STDA260721	XAL0563	3	2.4216	1033.56	2569.11	0.597	1.5014e-12	3.5648e-14	0.0237432	1.44094e+08	3.42275e+06	2.37536
STDA160821	XAL0575	5	2.4565	1033.56	2580.65	0.5	1.2686e-12	4.18938e-14	0.0330236	1.46012e+08	4.82435e+06	3.30408
STDA060921	XAL0567	8	2.4408	1033.56	2552.04	0.521	1.3501e-12	4.1899e-14	0.031034	1.4748e+08	4.57915e+06	3.10493

## Sheet: Carrier Blanks
Sheet 5: Analytical data for Al carrier blanks
Sample ID	AMS ID	Carrier	Total Al	26Al/27Al	±
		(g)	(mg)	Ratio
ALCB-01	XAL0556	2.5286	2.6172	1.678e-15	4.658e-16
ALCB-02	XAL0557	2.5313	2.6191	9.174e-16	2.372e-16
