# Supplementary material for: Reversible ice sheet thinning in the Amundsen Sea Embayment during the Late Holocene
Source: Copernicus journal article supplement (doi:10.5194/tc-2022-172), 2022-09-14
Supplement: Supplementary file 4 [file S4_10Be.xlsx]

## Sheet: Core Data
Sheet 1: Analytical data for Be-10 measurements on Kay Peak subglacial bedrock core samples
			Be Carrier	Be Carrier			Measured			Sample prep dominates blank correction with average blank
	AMS	Batch	Mass	Concentration	Total Be	Quartz Mass	10Be/9Be	±	±	10Be	±	±
Sample ID	ID	Number	(g)	(ug Be/g)	(mg)	(g)	Ratio		%	[atoms/g of q]		[%]
H1-17-27	XBE1216	3	0.3393	775.231	0.263036	18.397	8.6285e-15	4.75101e-16	5.50618	6597.63	645.78	9.78807
H1-48-58	XBE1217	3	0.3394	775.231	0.263113	13.485	4.8393e-15	3.27198e-16	6.76128	4063.8	758.084	18.6545
H1-105-114R	XBE1218	3	0.3395	775.231	0.263191	11.045	3.1213e-15	2.82132e-16	9.03892	2228.26	887.236	39.8175
H4-17-27	XBE1219	3	0.3397	775.231	0.263346	18.818	5.3067e-15	7.19061e-16	13.5501	3353.2	808.581	24.1137
H4-119-128	XBE1220	3	0.3397	775.231	0.263346	21.36	5.3895e-15	3.80536e-16	7.06069	3022.36	504.778	16.7014
H5-10-20	XBE1221	3	0.339	775.231	0.262803	9.419	4.2701e-15	3.37413e-16	7.90176	4746.19	1095.75	23.0869
H1-27-37	XBE1247	4	0.339	775.231	0.262803	14.423	7.4304e-15	4.41887e-16	5.94702	6947.42	795.462	11.4498
H1-58-68	XBE1248	4	0.3387	775.231	0.262571	13.055	5.382e-15	3.36235e-16	6.24741	4913.59	789.431	16.0663
H1-78-88	XBE1249	4	0.3391	775.231	0.262881	9.44	3.519e-15	2.84048e-16	8.07183	3340.31	1039.58	31.1223
H4-27-37	XBE1250	4	0.3371	775.231	0.26133	19.416	4.8275e-15	3.25848e-16	6.74983	2782.13	524.705	18.8599
H4-58-68	XBE1251	4	0.3384	775.231	0.262338	13.333	4.5077e-15	3.76718e-16	8.3572	3655.35	804.381	22.0056
H4-109-119	XBE1252	4	0.338	775.231	0.262028	14.681	3.7912e-15	2.9886e-16	7.883	2458.82	677.03	27.5347
H5-20-30	XBE1253	4	0.3376	775.231	0.261718	13.037	5.036e-15	3.21306e-16	6.38018	4432.7	778.415	17.5607
H5-71-81	XBE1254	4	0.3384	775.231	0.292058	16.81	4.6666e-15	4.78053e-16	10.2441	3616.29	748.828	20.7071
H5-120-128	XBE1255	4	0.3389	775.231	0.262726	13.567	4.4146e-15	3.24626e-16	7.35345	3480.44	751.284	21.5859
H1-7-17	XBE1259	5	0.3362	775.231	0.260633	16.328	7.9035e-15	3.86434e-16	4.88941	6575.47	661.627	10.062
H1-88-95	XBE1260	5	0.3383	775.231	0.262261	10.197	3.2893e-15	2.87367e-16	8.73643	2683.26	964.726	35.9535
H4-37-47	XBE1261	5	0.337	775.231	0.261253	14.336	4.588e-15	2.8222e-16	6.15125	3474.59	682.328	19.6377
H4-78-88	XBE1262	5	0.3375	775.231	0.261641	14.872	3.7894e-15	3.18513e-16	8.40536	2418.53	680.495	28.1368
H4-128-137	XBE1263	5	0.3382	775.231	0.262183	13.86	2.8274e-15	2.33189e-16	8.24748	1389.02	677.217	48.7549
H5-30-40	XBE1264	5	0.3382	775.231	0.262183	21.448	6.4355e-15	4.05556e-16	6.30186	3844.85	514.761	13.3883
H5-51-61	XBE1265	5	0.339	775.231	0.262803	13.835	3.7188e-15	3.29654e-16	8.86452	2531.48	740.387	29.2472
H5-81-91	XBE1266	5	0.3387	775.231	0.262571	14.807	3.8586e-15	4.39528e-16	11.3909	2527.05	772.632	30.5744
H5-101-111	XBE1267	5	0.3389	775.231	0.262726	15.291	4.0378e-15	2.81395e-16	6.96903	2655.42	640.152	24.1074
H1-68-78	XBE1271	7	0.3395	775.231	0.263191	13.547	4.5749e-15	3.16724e-16	7.981	3703.81	747.115	20.1715
H1-105-114	XBE1272	7	0.3379	775.231	0.261951	14.331	3.9709e-15	2.76687e-16	7.809	2736.99	679.643	24.8318
H4-7.5-17	XBE1273	7	0.3392	775.231	0.262958	19.331	5.9986e-15	4.18878e-16	7.581	3886.03	579.714	14.9179
H4-68-78	XBE1274	7	0.3383	775.231	0.262261	9.538	2.945e-15	2.3774e-16	9.054	2236.05	987.811	44.1767
H4-88-98	XBE1275	7	0.3382	775.231	0.262183	12.721	3.8092e-15	3.60457e-16	8.639	2865.55	829.295	28.9402
H5-0-10	XBE1276	7	0.3388	775.231	0.262648	10.781	4.5701e-15	3.08415e-16	7.293	4630.86	930.846	20.1009
H5-61-71	XBE1277	7	0.3385	775.231	0.262416	9.371	2.8847e-15	2.69102e-16	10.26	2166.32	1032.84	47.677
H5-91-101	XBE1278	7	0.3383	775.231	0.262261	12.477	3.9722e-15	2.81772e-16	7.881	3152.11	784.441	24.8862
H5-112-120	XBE1279	7	0.3385	775.231	0.262416	17.376	4.0364e-15	2.89698e-16	8.032	2330.56	567.439	24.3478
H1-37-47	XBE1227	8	0.3379	775.231	0.261951	11.171	4.4071e-15	3.04011e-16	6.89822	4194.71	893.959	21.3116
H4-47-57	XBE1228	8	0.3391	775.231	0.262881	14.633	3.5324e-15	2.94625e-16	8.34065	2170.98	677.195	31.1931
H4-98-108	XBE1229	8	0.3388	775.231	0.262648	10.676	3.0784e-15	5.11727e-16	16.6231	2224.15	1155.09	51.9341
H5-40-50	XBE1230	8	0.3393	775.231	0.263036	23.212	6.8026e-15	4.26164e-16	6.26473	3846.44	486.491	12.6478

## Sheet: Blanks
Sheet 2: Be-10 process blank data for the period during which Kay Peak samples were prepared at CosmIC.
			Carrier	Carrier			Measured
	AMS	Batch	Mass	Concentration	Total Be	Quartz Mass	10Be/9Be	±	±
Blank ID	ID	Number	(g)	(ug Be/g)	(ug)	(g)	Ratio		%
BLK250521	XBE1200	1	0.3383	775.23	262.26	0	1.959e-15	2.836e-16	14.5
BLK050721	XBE1284	2	0.3389	775.23	262.725	0	1.614e-15	2.445e-16	15.1
BLK260721A	XBE1212	3	0.3394	775.231	263.113	0	2.0694e-15	2.1679e-16	10.476
BLK260721B	XBE1223	3	0.3394	775.231	263.113	0	2.3841e-15	3.3465e-16	14.0368
BLK020821A	XBE1246	4	0.3383	775.231	262.261	0	2.4366e-15	2.45239e-16	10.0648
BLK020821B	XBE1257	4	0.3375	775.231	261.641	0	1.8939e-15	3.74978e-16	19.7992
BLK160821A	XBE1258	5	0.339	775.231	262.803	0	7.0544e-16	1.36212e-16	19.3087
BLK160821B	XBE1269	5	0.3382	775.231	262.183	0	1.3613e-15	2.01736e-16	14.8194
BLK310821A	XBE1270	7	0.3383	775.231	262.261	0	1.4146e-15	1.76778e-16	12.4967
BLK310821B	XBE1281	7	0.3392	775.231	262.958	0	1.491e-15	2.31184e-16	15.5053
BLK060921A	XBE1225	8	0.3387	775.231	262.571	0	1.5028e-15	1.94681e-16	12.9545
BLK060921B	XBE1233	8	0.3375	775.231	261.641	0	1.8876e-15	2.33165e-16	12.3525

## Sheet: Field Replicates
Sheet 3: Analytical data for Be-10 measurements on field replicates of Kay Peak subglacial bedrock core samples
			Be Carrier	Be Carrier			Measured			Sample prep dominates blank correction with average blank
	AMS	Batch	Mass	Concentration	Total Be	Quartz Mass	10Be/9Be	±	±	10Be	±	±
Sample ID	ID	Number	(g)	(ug Be/g)	(mg)	(g)	Ratio		%	[atoms/g of q]		[%]
H6-surface	XBE1215 XBE1216 XBE1217 XBE1218 XBE1219 XBE1220 XBE1221	3	0.3386	775.231	0.262493	6.707	8.8196e-15	7.93318e-16	8.99494	18550.1	2427.32	13.0852
H6-surfaceR	XBE1226	8	0.3383	775.231	0.262261	6.617	8.3835e-15	5.15759e-16	6.15207	17626.7	1869.98	10.6088

## Sheet: CRONUS A Data
Sheet 4: Analytical data for Be-10 measurements on CRONUS A reference material replicate samples
			Be Carrier	Be Carrier			Measured			Sample prep dominates blank correction with average blank
	AMS	Batch	Mass	Concentration	Total Be	Quartz Mass	10Be/9Be	±	±	10Be	±	±
Sample ID	ID	Number	(g)	(ug Be/g)	(mg)	(g)	Ratio		%	[atoms/g of q]		[%]
STDA260721	XBE1222	3	0.3392	775.231	0.262958	0.597	1.1943e-12	2.03121e-14	1.70075	3.51009e+07	598010	1.70369
STDA020821	XBE1256	4	0.3269	775.231	0.253423	0.507	1.0654e-12	1.98357e-14	1.86181	3.55256e+07	662739	1.86553
STDA160821	XBE1268	5	0.3377	775.231	0.261796	0.5	1.0106e-12	1.88121e-14	1.86148	3.52977e+07	658404	1.86529
STDA310821	XBE1280	7	0.3383	775.231	0.262261	0.515	1.0545e-12	2.3552e-14	1.653	3.58245e+07	801612	2.23761
STDA060921	XBE1232	8	0.3376	775.231	0.261718	0.521	1.0544e-12	1.90451e-14	1.80625	3.53352e+07	639497	1.8098

## Sheet: Carrier Blanks
Sheet 5: Analytical data for Be carrier blanks
Sample ID	AMS ID	Carrier	Total Be	9Be/1Be	±
		(g)	(mg)	Ratio
UVM-17-1A	XBE1282	0.341	0.264353	3.79e-16	8.29853e-17
UVM-17-1B	XBE1283	0.3401	0.263656	1.3616e-16	5.56275e-17
