# Supplementary material for: Reversible ice sheet thinning in the Amundsen Sea Embayment during the Late Holocene
Source: Copernicus journal article supplement (doi:10.5194/tc-2022-172), 2022-09-14
Supplement: Supplementary file 5 [file S5_14C.xlsx]

## Sheet: Core Data
Sheet 1: Analytical data for C-14 measurements on Kay Peak subglacial bedrock core samples
																	Uncorrected for blank			Blank-corrected
Core number	Sample ID	Replicate	TUCNL	AMS Lab	AMS ID	Quartz weight	C yield	±1σ	Diluted Gas Mass	±1σ	14C/13C corrected	±1σ	δ13C	±1σ	14C/C total	±1σ	Total 14C	±1σ		14C concentration
						(g)	(μg)	(μg)	(μg)	(μg)			(‰)	(‰)			(atoms)	(atoms)		(atoms g-1)	68% confidence	95% confidence
H1	19-KP-H1-7-17	a	697	NOSAMS	OS-161647	5.0203	10	0.1	116.5	1.5	3.85e-12	4.11e-14	-4.69	0.5	4.22e-14	4.51e-16	246000	5400		38800	27900-44300	10300-47100
H1	19-KP-H1-7-17	b	778	NOSAMS	OS-163414	5.0865	12.4	0.2	113.6	1.5	3.45e-12	5.43e-14	-4	0.5	3.78e-14	5.96e-16	216000	4830		32500	22200-37900	7500-40600
H1	19-KP-H1-17-27	a	717	NOSAMS	OS-161678	5.0577	8.8	0.1	112.8	1.4	4.28e-12	5.5e-14	-5.22	0.5	4.7e-14	6.04e-16	266000	5960		42400	31400-47900	12400-50900
H1	19-KP-H1-17-27	b	738	NOSAMS	OS-162196	5.0156	7.8	0.1	113.7	1.5	2.5e-12	3.97e-14	-3.75	0.5	2.75e-14	4.36e-16	157000	4740		21700	12800-26800	3400-29400
H1	19-KP-H1-27-37	a	720	NOSAMS	OS-161683	5.0121	10.2	0.1	112.7	1.4	2.88e-12	4.02e-14	-4.68	0.5	3.16e-14	4.41e-16	178000	4860		25700	16100-31000	4400-33600
H1	19-KP-H1-27-37	b	779	NOSAMS	OS-163416	5.073	10.5	0.1	115.6	1.5	3.48e-12	5.44e-14	-4.35	0.5	3.82e-14	5.98e-16	222000	4920		33800	23400-39200	8300-41900
H1	19-KP-H1-37-47	a	713	NOSAMS	OS-161674	5.0247	18.6	0.2	115	1.5	1.12e-11	8.55e-14	-6.9	0.5	1.22e-13	9.39e-16	704000	11100		129600	118300-135600	97600-139300	Note: rejected as outlier at > 99% confidence. Excluded from further consideration.
H1	19-KP-H1-48-58	a	718	NOSAMS	OS-161679	5.2761	9	0.1	114.7	1.5	2.45e-12	2.64e-14	-3.81	0.5	2.68e-14	2.9e-16	154000	4350		20100	11700-24900	3000-27300
H1	19-KP-H1-48-58	b	774	NOSAMS	OS-163410	5.0735	8.1	0.1	114.3	1.5	2.15e-12	5.22e-14	-3.23	0.5	2.37e-14	5.73e-16	136000	4240		17500	9600-22400	2200-24800
H1	19-KP-H1-58-68	a	695	NOSAMS	OS-161650	5.0699	8.3	0.1	113.6	1.5	3.33e-12	5.42e-14	-4.22	0.5	3.65e-14	5.94e-16	208000	5550		31100	21000-36500	6900-39300
H1	19-KP-H1-58-68	b	773	NOSAMS	OS-163408	5.0127	4.4	0.1	115.5	1.5	2.65e-12	9.32e-14	-1.98	0.5	2.91e-14	1.02e-15	169000	6630		23900	14600-29200	4000-32100
H1	19-KP-H1-68-78	a	722	NOSAMS	OS-161684	5.069	11.1	0.1	115.9	1.5	6.16e-12	5.6e-14	-5.22	0.5	6.76e-14	6.15e-16	393000	7090		67300	55900-73000	35300-76000	Note: rejected as outlier at > 99% confidence. Excluded from further consideration.
H1	19-KP-H1-68-78	b	775	NOSAMS	OS-163411	4.9956	5.1	0.1	115.8	1.5	2.55e-12	6.64e-14	-2.79	0.5	2.8e-14	7.29e-16	162000	5140		22700	13600-27900	3600-30500
H1	19-KP-H1-78-88	a	716	NOSAMS	OS-161677	4.9801	15.9	0.2	115.5	1.5	2.69e-12	4e-14	-4.54	0.5	2.95e-14	4.39e-16	171000	4850		24500	14900-29800	4000-32400
H1	19-KP-H1-78-88	b	737	NOSAMS	OS-162195	5.0503	16.2	0.2	114.6	1.5	1.85e-12	3.85e-14	-4.36	0.5	2.03e-14	4.22e-16	117000	4510		14200	7100-18900	1500-21300
H1	19-KP-H1-88-95	a	780	NOSAMS	OS-163417	2.3955	3.5	0	116.2	1.5	8.14e-13	3.35e-14	-2.82	0.5	8.97e-15	3.69e-16	52300	3040		9100	3100-14700	600-18200
H1	19-KP-H1-95-105	a	714	NOSAMS	OS-161676	5.0063	8.8	0.1	88.7	1.1	2.75e-12	3.95e-14	-5.37	0.5	3.02e-14	4.33e-16	134000	4350		17400	9400-22300	2300-24900
H1	19-KP-H1-95-105	b	777	NOSAMS	OS-161676	4.0748	7	0.1	114.6	1.5	2.11e-12	5.21e-14	-3.56	0.5	2.32e-14	5.72e-16	133000	4220		21200	11500-27200	2900-30200
H1	19-KP-H1-95-105	aa	692	NOSAMS	OS-162194	5.0655	3.1	0	116.6	1.5	1.21e-12	2.42e-14	-4.19	0.5	1.33e-14	2.65e-16	77500	3960		7700	3100-11400	600-13500
H1	19-KP-H1-95-105	bb	736	NOSAMS	OS-163413	5.0238	4.8	0.1	115.5	1.5	2.07e-12	5.2e-14	-3.42	0.5	2.27e-14	5.7e-16	131000	5100		16800	9000-21800	2200-24300
H4	19-KP-H4-7.5-17A	a	691	NOSAMS	OS-161646	5.0141	5.5	0.1	113.7	1.5	2.5e-12	3.97e-14	-4.39	0.5	2.75e-14	4.36e-16	157000	4740		21700	12800-26800	3300-29400
H4	19-KP-H4-7.5-17A	b	746	NOSAMS	OS-162203	5.0699	4.7	0.1	114.5	1.5	1.21e-12	2.41e-14	-3.05	0.5	1.32e-14	2.65e-16	76000	3940		7500	3000-11100	600-13200
H4	19-KP-H4-17-27	a	743	NOSAMS	OS-162200	5.0353	11.6	0.1	115.4	1.5	3e-12	4.04e-14	-3.84	0.5	3.3e-14	4.45e-16	191000	4990		28000	18300-33300	5700-36100
H4	19-KP-H4-17-27	b	758	NOSAMS	OS-163389	5.0168	11.1	0.1	128.6	1.6	2.65e-12	8.03e-14	-3.08	0.5	2.91e-14	8.82e-16	188000	6500		27600	17700-32900	5400-35900
H4	19-KP-H4-27-37	a	750	NOSAMS	OS-163384	5.0368	5.5	0.1	114.9	1.5	1.24e-12	4.84e-14	-3.3	0.5	1.36e-14	5.32e-16	78100	3810		7800	3200-11600	600-13700
H4	19-KP-H4-27-37	b	770	NOSAMS	OS-163378	4.6061	5	0.1	115	1.5	1.47e-12	3.73e-14	-2.89	0.5	1.61e-14	4.09e-16	92800	3340		11100	5000-15700	1000-18000
H4	19-KP-H4-37-47	a	744	NOSAMS	OS-163404	5.0733	6.9	0.1	152.8	2	1.19e-12	2.47e-14	-0.11	0.5	1.3e-14	2.71e-16	99600	4270		11200	5300-15500	1000-17700
H4	19-KP-H4-37-47	b	756	NOSAMS	OS-162201	5.0803	7.1	0.1	115.7	1.5	1.64e-12	3.79e-14	-3.68	0.5	1.81e-14	4.17e-16	105000	3440		12000	5700-16500	1200-18700
H4	19-KP-H4-47-57	a	752	NOSAMS	OS-163386	5.054	11.5	0.1	115.7	1.5	2.88e-12	5.36e-14	-3.85	0.5	3.17e-14	5.89e-16	184000	4620		26600	17000-31800	4800-34500
H4	19-KP-H4-47-57	b	771	NOSAMS	OS-163381	5.0109	7	0.1	89.1	1.1	2.27e-12	5.16e-14	-5.05	0.5	2.49e-14	5.66e-16	111000	3550		13300	6500-17900	1400-20100
H4	19-KP-H4-58-68	a	747	NOSAMS	OS-163405	5.0103	5.5	0.1	114.9	1.5	1.89e-12	5.15e-14	-2.97	0.5	2.07e-14	5.64e-16	120000	4130		14900	7600-19600	1700-22100
H4	19-KP-H4-58-68	b	759	NOSAMS	OS-162204	5.0459	6.3	0.1	116	1.5	2.1e-12	5.21e-14	-2.88	0.5	2.3e-14	5.72e-16	134000	4260		17300	9400-22100	2400-24700
H4	19-KP-H4-68-78	a	694	NOSAMS	OS-163391	5.0688	12.8	0.2	113.8	1.5	3.16e-12	8.1e-14	-4.4	0.5	3.46e-14	8.88e-16	198000	6660		29200	19200-34600	6100-37500
H4	19-KP-H4-68-78	b	768	NOSAMS	OS-161648	5.113	11.2	0.1	114.3	1.5	1.91e-12	5.15e-14	-3.03	0.5	2.09e-14	5.66e-16	120000	4130		14500	7400-19200	1700-21600
H4	19-KP-H4-78-88	a	753	NOSAMS	OS-163401	4.8626	6.1	0.1	115.5	1.5	2.1e-12	5.21e-14	-3.66	0.5	2.3e-14	5.72e-16	133000	4250		17700	9600-22800	2200-25400
H4	19-KP-H4-78-88	b	769	NOSAMS	OS-163383	4.9552	2.3	0	99.2	1.3	1.12e-12	3.51e-14	-2.49	0.5	1.24e-14	3.86e-16	61400	2910		5600	2100-8700	400-10600
H4	19-KP-H4-88-98	a	749	NOSAMS	OS-163403	4.9476	4.3	0.1	114.1	1.5	1.51e-12	3.75e-14	-4.52	0.5	1.66e-14	4.12e-16	94900	3340		10700	4900-14900	900-17300
H4	19-KP-H4-88-98	b	760	NOSAMS	OS-163377	5.1532	4.7	0.1	115	1.5	1.79e-12	3.83e-14	-2.96	0.5	1.97e-14	4.21e-16	113000	3490		13300	6600-17700	1400-20000
H4	19-KP-H4-98-108	a	751	NOSAMS	OS-163392	5.1193	5.5	0.1	113.7	1.5	1.89e-12	5.14e-14	-3.47	0.5	2.07e-14	5.64e-16	118000	4100		14200	7200-18800	1500-21200
H4	19-KP-H4-109-119	a	755	NOSAMS	OS-163379	4.9968	8.4	0.1	115.6	1.5	3.47e-12	5.44e-14	-4.3	0.5	3.81e-14	5.97e-16	221000	4910		34100	23500-39600	8000-42200
H4	19-KP-H4-119-128	a	754	NOSAMS	OS-163385	5.0515	5	0.1	112.8	1.4	1.93e-12	5.15e-14	-2.91	0.5	2.12e-14	5.65e-16	120000	4090		14700	7500-19400	1500-21900
H4	19-KP-H4-119-128	b	772	NOSAMS	OS-163406	5.0329	1.9	0	114.9	1.5	7.69e-13	3.29e-14	-3.89	0.5	8.45e-15	3.62e-16	48700	2980		3900	1300-6400	200-8000
H4	19-KP-H4-128-137	a	693	NOSAMS	OS-161648	4.9166	4.5	0.1	113.8	1.5	2.27e-12	2.62e-14	-3.98	0.5	2.49e-14	2.88e-16	142000	4270		19300	10700-24300	2600-26900
H4	19-KP-H4-128-137	b	740	NOSAMS	OS-162197	4.9803	3.4	0	113.9	1.5	9.86e-13	2.32e-14	-2.84	0.5	1.08e-14	2.54e-16	61700	3870		5600	2100-8700	300-10800
H5	19-KP-H5-0-10	a	712	NOSAMS	OS-161673	5.085	7.1	0.1	114.3	1.5	2.75e-12	6.68e-14	-4.06	0.5	3.01e-14	7.31e-16	173000	5890		24300	15100-29500	3900-32400
H5	19-KP-H5-61-71	a	711	NOSAMS	OS-161672	5.0267	7.4	0.1	115.2	1.5	2.27e-12	2.63e-14	-4.33	0.5	2.49e-14	2.88e-16	144000	4290		19200	10900-24200	2700-26700
H5	19-KP-H5-120-128	a	710	NOSAMS	OS-161671	5.1177	10.1	0.1	140.1	1.8	2.6e-12	4.03e-14	-3.76	0.5	2.86e-14	4.42e-16	201000	5340		29400	19600-34800	6400-37400
H5	19-KP-H5-120-128	b	745	NOSAMS	OS-162202	5.0047	8.8	0.1	115.1	1.5	1.72e-12	3.81e-14	-3.66	0.5	1.89e-14	4.19e-16	109000	4480		12900	6200-17500	1300-20000
Notes:
1. Sample names in column 2 indicate sample depths below core top in centimeters. For example, 19-KP-H1-7-17 is the 7-17 cm segment of core 19-KP-H1.

## Sheet: Surface Data
Sheet 2: Analytical data for 14C measurements on Kay Peak Ridge bedrock samples
															Uncorrected		Blank-corrected
Sample ID	TUCNL	AMS Lab	AMS ID	Quartz weight	C yield	±1σ	Diluted Gas Mass	±1σ	14C/13C corrected	±1σ	δ13C	±1σ	14C/C total	±1σ	Total 14C	±1σ	14C concentration
				(g)	(μg)	(μg)	(μg)	(μg)			(‰)	(‰)			(atoms)	(atoms)	(atoms g-1)	68% confidence	95% confidence
19-KP-012-BR	663	NOSAMS	OS-160573	5.0513	6.1	0.1	111.8	1.4	9.36e-12	5.68e-14	-4.35	0.5	1.03e-13	6.24e-16	576000	8160	103800	92400-109500	71700-112700
19-KP-001-BR	666	NOSAMS	OS-160574	4.9876	7.3	0.1	112.1	1.4	6.74e-12	8.43e-14	-4.06	0.5	7.4e-14	9.25e-16	416000	7440	73000	61500-78800	40600-81900
19-KP-008-BR	670	NOSAMS	OS-160579	5.0126	6.6	0.1	113.5	1.5	9.05e-12	8.51e-14	-4.25	0.5	9.92e-14	9.34e-16	565000	8980	102300	90900-108100	69700-111600
19-KP-006-BR	677	NOSAMS	OS-161629	5.1685	11.1	0.1	112.8	1.4	1.18e-11	9.99e-14	-5.58	0.5	1.29e-13	1.1e-15	730000	11200	131100	120000-137000	99600-140500
19-KP-007-BR	681	NOSAMS	OS-161636	5.4806	6.2	0.1	115.1	1.5	8.14e-12	5.66e-14	-4.72	0.5	8.93e-14	6.21e-16	515000	7510	84500	74100-89700	55000-92600
19-KP-009-BR	682	NOSAMS	OS-161637	5.0717	5.3	0.1	115.1	1.5	9.19e-12	7.09e-14	-4.14	0.5	1.01e-13	7.79e-16	582000	8710	104400	93200-110300	72700-113600
19-KP-010-BR	684	NOSAMS	OS-161639	5.0401	5.1	0.1	113.4	1.5	7.21e-12	5.63e-14	-3.91	0.5	7.91e-14	6.19e-16	450000	6750	79000	67600-84700	47000-87700
19-KP-003-BR	685	NOSAMS	OS-161640	5.0383	12.3	0.2	113.8	1.5	9.12e-12	8.51e-14	-4.72	0.5	1e-13	9.34e-16	571000	9040	103000	91700-108800	70700-112100
19-KP-011-BR	734	NOSAMS	OS-162191	4.9978	10.5	0.1	115.4	1.5	1.08e-11	9.97e-14	-4.5	0.5	1.18e-13	1.09e-15	682000	10800	126000	114500-131900	93700-135600
KAY-101	465	NOSAMS	OS-151935	5.0096	5.2	0.1	110.1	1.4	8.83e-12	5.61e-14	-4.11	0.5	9.7e-14	6.17e-16	535000	7650	96400	84900-102200	64400-105300
KAY-103	472	NOSAMS	OS-153612	5.2751	16.2	0.2	112.6	1.4	9.66e-12	8.17e-14	-8.88	0.5	1.06e-13	8.93e-16	596000	9150	103100	92300-108600	72300-111800
KAY-105	475	NOSAMS	OS-153616	5.7106	3.6	0	111.7	1.4	6.06e-12	5.36e-14	-4.03	0.5	6.65e-14	5.89e-16	373000	5800	56200	46200-61200	27800-63800
KAY-107	479	NOSAMS	OS-153619	4.9665	5.7	0.1	108.9	1.4	7.24e-12	7.17e-14	-4.67	0.5	7.94e-14	7.87e-16	433000	7020	76700	65200-82600	44100-85500
KAY-108	482	NOSAMS	OS-153623	5.1524	29.9	0.4	113.8	1.5	9.22e-12	1.01e-13	-6.26	0.5	1.01e-13	1.11e-15	576000	9720	101700	90500-107400	70200-110800
KAY-110	483	NOSAMS	OS-153630	5.115	10.1	0.1	111.6	1.4	8.19e-12	6.4e-14	-5.21	0.5	8.98e-14	7.03e-16	503000	7540	88200	77000-93800	56600-96900
KAY-109	489	NOSAMS	OS-153624	5.0536	6.3	0.1	112.4	1.4	6.3e-12	5.48e-14	-4.28	0.5	6.91e-14	6.02e-16	389000	6030	66700	55200-72300	34500-75300
KAY-111	490	NOSAMS	OS-153631	5.5534	9.3	0.1	112.3	1.4	8.72e-12	8.59e-14	-16.19	0.5	9.46e-14	9.32e-16	533000	8610	86600	76100-91800	57600-94900
Notes:
1. Samples with "KAY-XXX" sample names were previously described in Johnson et al. (2020).

## Sheet: Blanks
Sheet 3: 14C process blank data for the period during which Kay Peak samples were analyses at TUCNL.
TUCNL#	Blank ID	Date Extracted	AMS Lab	AMS ID	C YIELD	±1σ	Diluted Gas Mass	±1σ	14C/13C corrected	±1σ	δ13C	±1σ	14C/C total	±1σ	Total atoms 14C
					Mass (ug)	(μg)	(μg)	(μg)			(‰)	(‰)				±1σ	Notes
435	PB090419	2019-09-05	NOSAMS	OS-150630	0.3	0.0038	110.4	1.4138	6.69e-14	2.79e-15	-4.11	0.5	7.34e-16	3.07e-17	4064	178	Thick tube
444	PB093019	2019-09-30	NOSAMS	OS-151949	1.6	0.0205	88.4	1.1321	4.17e-13	1.11e-14	-4.2	0.5	4.58e-15	1.22e-16	20282	601	Thick tube
451	PB101019	2019-10-11	NOSAMS	OS-151949	1.1	0.0141	96.8	1.2396	3.53e-13	1.16e-14	-5	0.5	3.87e-15	1.27e-16	18763	662	Thick tube
461	PB102419	2019-10-25	NOSAMS	OS-151949	0.7	0.009	110.6	1.4164	2.61e-13	9.79e-15	-4.07	0.5	2.86e-15	1.08e-16	15860	630	Thick tube
468	PB111019	2019-11-11	NOSAMS	OS-153648	1.2	0.0154	112.6	1.442	5.13e-13	1.76e-14	-3.65	0.5	5.63e-15	1.93e-16	31772	1163	Thick tube
477	PB112119	2019-11-22	NOSAMS	OS-153648	0.5	0.0064	111.7	1.4305	1.64e-13	7.1e-15	-3.45	0.5	1.81e-15	7.8e-17	10114	456	Thick tube
486	PB120819	2019-12-09	NOSAMS	OS-153649	0.7	0.009	112.6	1.442	2.92e-13	1.3e-14	-3.33	0.5	3.2e-15	1.43e-16	18088	840	Thick tube
491	PB010720	2020-01-07	NOSAMS	OS-153651	0.3	0.0038	110.9	1.4202	2.15e-13	1.37e-14	-3.1	0.5	2.36e-15	1.5e-16	13108	852	Thick tube
499	PB012920	2020-01-30	NOSAMS	OS-153651	1.4	0.0179	111	1.4215	1.11e-12	2.66e-14	-3.05	0.5	1.22e-14	2.93e-16	67677	1845	Thick tube
508	PB021120	2020-02-12	NOSAMS	OS-153652	4.2	0.0538	114.1	1.4612	1.58e-12	3.1e-14	-3.23	0.5	1.73e-14	3.41e-16	99217	2328	Thick tube
517	PB022220	2020-02-22	PRIME	202000812	1.1	0.0141	287.4	3.6805	4.09e-13	3.47e-14	-1.6	0.5	4.5e-15	3.81e-16	64902	5556	Thick tube
526	PB030320	2020-03-03	PRIME	202000813	1.8	0.0231	283.2	3.6267	6.15e-13	3.51e-14	-1.9	0.5	6.76e-15	3.86e-16	95957	5619	Thick tube
528	PB030720	2020-03-07	PRIME	202000814	1.5	0.0192	285.5	3.6562	6.17e-13	4.13e-14	-1.57	0.5	6.79e-15	4.55e-16	97234	6629	Thick tube
534	PB031620	2020-03-16	PRIME	202000815	3.8	0.0487	282	3.6114	8.64e-13	7.78e-14	-9.23	0.5	9.44e-15	8.5e-16	133408	12137	Thick tube
535	PB052620	2020-05-26	NOSAMS	OS-156029	2.7	0.0346	111.4	1.4266	2.31e-12	2.63e-14	-6.7	0.5	2.53e-14	2.88e-16	141445	2423	Thick tube
544	PB061720	2020-06-18	NOSAMS	OS-156029	1.5	0.0192	112.4	1.4394	1.03e-12	1.59e-14	-4.74	0.5	1.13e-14	1.74e-16	63741	1276	Thick tube
553	PB070920	2020-07-10	NOSAMS	OS-156802	1	0.0128	111.6	1.4292	6.97e-13	1.29e-14	-4.31	0.5	7.64e-15	1.42e-16	42771	964	Thick tube
562	PB072620	2020-07-27	NOSAMS	OS-156802	1	0.0128	112.1	1.4356	8.07e-13	1.54e-14	-4.05	0.5	8.85e-15	1.7e-16	49750	1147	Thick tube
571	PB081120	2020-08-12	NOSAMS	OS-156802	2.2	0.0282	111.9	1.433	1.64e-12	2.29e-14	-3.43	0.5	1.81e-14	2.52e-16	101268	1917	Thick tube
578	PB082720	2020-08-27	NOSAMS	OS-158280	1.2	0.0154	112.7	1.4433	4.01e-13	1.78e-14	-3.79	0.5	4.41e-15	1.96e-16	24898	1152	Thick tube
587	PB091020	2020-09-10	NOSAMS	OS-158279	2.7	0.0346	91.1	1.1666	1.39e-12	2.41e-14	-4.26	0.5	1.52e-14	2.64e-16	69444	1500	Thick tube
588	PB091520	2020-09-15	NOSAMS	OS-158280	1.6	0.0205	110.9	1.4202	1.26e-12	2.42e-14	-4.08	0.5	1.38e-14	2.66e-16	76817	1775	Thick tube
597	PB100620	2020-10-06	NOSAMS	OS-158275	1.2	0.0154	111.3	1.4253	7.64e-13	2.18e-14	-3.38	0.5	8.39e-15	2.4e-16	46813	1466	Thick tube
606	PB111620	2020-11-16	NOSAMS	OS-159823	1.2	0.0154	113.6	1.4548	7.03e-13	2.27e-14	-2.92	0.5	7.72e-15	2.5e-16	43968	1530	Thick tube
613	PB120920	2020-12-09	NOSAMS	OS-159834	1.1	0.0141	111.4	1.4266	5.5e-13	1.43e-14	-3.81	0.5	6.04e-15	1.57e-16	33733	979	Thick tube
619	PB121620	2020-12-16	NOSAMS	OS-159846	0.6	0.0077	112.8	1.4445	7.28e-13	2.6e-14	-2.31	0.5	8.01e-15	2.86e-16	45278	1720	Thick tube
638	PB020121	2021-02-02	NOSAMS	OS-159866	1.4	0.0179	111.6	1.4292	1.25e-12	2.53e-14	-2.68	0.5	1.37e-14	2.78e-16	76531	1840	Thick tube
641	PB030121	2021-03-02	NOSAMS	OS-160549	1.1	0.0141	113.1	1.4484	7.96e-13	2.21e-14	-1.97	0.5	8.75e-15	2.43e-16	49601	1518	Thick tube
650	PB031621	2021-03-16	NOSAMS	OS-160580	1.8	0.0231	112	1.4343	1.64e-12	3.78e-14	-3.22	0.5	1.8e-14	4.16e-16	101101	2669	Thick tube
654	PB032521	2021-03-26	NOSAMS	OS-160582	3.7	0.0474	112.8	1.4445	2.24e-12	5.24e-14	-4.41	0.5	2.46e-14	5.74e-16	138843	3703	Thick tube
655	PB032821	2021-03-29	NOSAMS	OS-160583	2.1	0.0269	112	1.4343	1.36e-12	3.68e-14	-3.49	0.5	1.5e-14	4.04e-16	83999	2513	Thick tube
656	PB033021	2021-03-31	NOSAMS	OS-160584	1.3	0.0166	112.4	1.4394	4.3e-13	1.83e-14	-3.42	0.5	4.72e-15	2.01e-16	26617	1183	Thick tube
665	PB041021	2021-04-10	NOSAMS	OS-160585	1.6	0.0205	113.7	1.4561	7.38e-13	2.17e-14	-4.23	0.5	8.1e-15	2.38e-16	46156	1481	Thick tube
674	PB042621	2021-04-26	NOSAMS	OS-161623	1.8	0.0231	113.9	1.4586	1.22e-12	2.41e-14	-3.49	0.5	1.34e-14	2.65e-16	76446	1803	Thick tube
683	PB051021	2021-05-11	NOSAMS	OS-161634	1.1	0.0141	114.1	1.4612	7.97e-13	2.21e-14	-4.08	0.5	8.74e-15	2.43e-16	50018	1530	Thick tube
690	PB052321	2021-05-24	NOSAMS	OS-161645	2.4	0.0307	113	1.4471	1.35e-12	2.45e-14	-5.22	0.5	1.48e-14	2.69e-16	83783	1864	Thick tube
696	PB052921	2021-05-29	NOSAMS	OS-161653	1.9	0.0243	113.7	1.4561	1.38e-12	3.69e-14	-3.55	0.5	1.51e-14	4.06e-16	86325	2563	Thick tube
709	PB061121	2021-06-12	NOSAMS	OS-161660	0.8	0.0102	113.1	1.4484	2.56e-13	7.32e-15	-3.53	0.5	2.81e-15	8.04e-17	15949	500	Thick tube
715	PB061721	2021-06-18	NOSAMS	OS-161667	1.6	0.0205	114	1.4599	6.8e-13	1.06e-14	-3.31	0.5	7.47e-15	1.17e-16	42685	863	Thick tube
721	PB062321	2021-06-24	NOSAMS	OS-161681	4.2	0.0538	113.7	1.4561	1.74e-12	2.55e-14	-3.93	0.5	1.91e-14	2.8e-16	109089	2119	Thick tube
730	PB070921	2021-07-10	NOSAMS	OS-162180	2.3	0.0295	114.3	1.4638	7.83e-13	2.2e-14	-2.84	0.5	8.6e-15	2.42e-16	49266	1525	Thick tube
739	PB072121	2021-07-22	NOSAMS	OS-162181	1.6	0.0205	113.7	1.4561	5.63e-13	2.01e-14	-3.21	0.5	6.18e-15	2.21e-16	35249	1338	Thick tube
748	PB080221	2021-08-03	NOSAMS	OS-163380	0.6	0.0077	114	1.4599	4.03e-13	1.79e-14	-2.67	0.5	4.43e-15	1.97e-16	25304	1171	Thin tube
757	PB081321	2021-08-14	NOSAMS	OS-163387	1.8	0.0231	114.3	1.4638	6.22e-13	2.07e-14	-3	0.5	6.83e-15	2.28e-16	39154	1398	Thin tube
766	PB082621	2021-08-27	NOSAMS	OS-163396	1.6	0.0205	113.6	1.4548	9.56e-13	2.31e-14	-9.42	0.5	1.05e-14	2.53e-16	59824	1633	Thin tube
767	PB092821	2021-09-29	NOSAMS	OS-163400	1.3	0.0166	111.8	1.4317	6.19e-13	2.06e-14	-2.31	0.5	6.8e-15	2.27e-16	38091	1360	Thin tube
776	PB101121	2021-10-12	NOSAMS	OS-163407	1.3	0.0166	114.3	1.4638	5.93e-13	2.05e-14	-2.47	0.5	6.51e-15	2.25e-16	37319	1373	Thin tube
781	QtzXtalBlankTest	2021-10-19	NOSAMS	OS-163412	1.2	0.0154	115.3	1.5	3.9e-13	1.77e-14	-3.13	0.5	4.29e-15	1.95e-16	24774	1170	Blank run with synthetic quartz over flux
782	QtzXtalBlankTest-BAKED	2021-10-20	NOSAMS	OS-163418	1.4	0.0179	114.8	1.5	4.92e-13	1.93e-14	-3.43	0.5	5.4e-15	2.12e-16	31075	1282	Blank run with synthetic quartz over flux

## Sheet: Reformatted for MATLAB paste
Note: this sheet reformats data from 'Core data' and 'Surface data' sheets for convenient pasting into MATLAB code.
Core data: area in yellow gets pasted into 'init_C14_data.m'
Sample name	Ntot	delNtot	Mq	Core num	Mid-depth (cm)				Split up sample name
19-KP-H1-7-17	246000	5400	5.0203	1	12				19	KP	H1	7	17
19-KP-H1-7-17	216000	4830	5.0865	1	12				19	KP	H1	7	17
19-KP-H1-17-27	266000	5960	5.0577	1	22				19	KP	H1	17	27
19-KP-H1-17-27	157000	4740	5.0156	1	22				19	KP	H1	17	27
19-KP-H1-27-37	178000	4860	5.0121	1	32				19	KP	H1	27	37
19-KP-H1-27-37	222000	4920	5.073	1	32				19	KP	H1	27	37
19-KP-H1-37-47	704000	11100	5.0247	1	42				19	KP	H1	37	47
19-KP-H1-48-58	154000	4350	5.2761	1	53				19	KP	H1	48	58
19-KP-H1-48-58	136000	4240	5.0735	1	53				19	KP	H1	48	58
19-KP-H1-58-68	208000	5550	5.0699	1	63				19	KP	H1	58	68
19-KP-H1-58-68	169000	6630	5.0127	1	63				19	KP	H1	58	68
19-KP-H1-68-78	393000	7090	5.069	1	73				19	KP	H1	68	78
19-KP-H1-68-78	162000	5140	4.9956	1	73				19	KP	H1	68	78
19-KP-H1-78-88	171000	4850	4.9801	1	83				19	KP	H1	78	88
19-KP-H1-78-88	117000	4510	5.0503	1	83				19	KP	H1	78	88
19-KP-H1-88-95	52300	3040	2.3955	1	91.5				19	KP	H1	88	95
19-KP-H1-95-105	134000	4350	5.0063	1	100				19	KP	H1	95	105
19-KP-H1-95-105	133000	4220	4.0748	1	100				19	KP	H1	95	105
19-KP-H1-95-105	77500	3960	5.0655	1	100				19	KP	H1	95	105
19-KP-H1-95-105	131000	5100	5.0238	1	100				19	KP	H1	95	105
19-KP-H4-7.5-17	157000	4740	5.0141	4	12.25				19	KP	H4	7.5	17
19-KP-H4-7.5-17	76000	3940	5.0699	4	12.25				19	KP	H4	7.5	17
19-KP-H4-17-27	191000	4990	5.0353	4	22				19	KP	H4	17	27
19-KP-H4-17-27	188000	6500	5.0168	4	22				19	KP	H4	17	27
19-KP-H4-27-37	78100	3810	5.0368	4	32				19	KP	H4	27	37
19-KP-H4-27-37	92800	3340	4.6061	4	32				19	KP	H4	27	37
19-KP-H4-37-47	99600	4270	5.0733	4	42				19	KP	H4	37	47
19-KP-H4-37-47	105000	3440	5.0803	4	42				19	KP	H4	37	47
19-KP-H4-47-57	184000	4620	5.054	4	52				19	KP	H4	47	57
19-KP-H4-47-57	111000	3550	5.0109	4	52				19	KP	H4	47	57
19-KP-H4-58-68	120000	4130	5.0103	4	63				19	KP	H4	58	68
19-KP-H4-58-68	134000	4260	5.0459	4	63				19	KP	H4	58	68
19-KP-H4-68-78	198000	6660	5.0688	4	73				19	KP	H4	68	78
19-KP-H4-68-78	120000	4130	5.113	4	73				19	KP	H4	68	78
19-KP-H4-78-88	133000	4250	4.8626	4	83				19	KP	H4	78	88
19-KP-H4-78-88	61400	2910	4.9552	4	83				19	KP	H4	78	88
19-KP-H4-88-98	94900	3340	4.9476	4	93				19	KP	H4	88	98
19-KP-H4-88-98	113000	3490	5.1532	4	93				19	KP	H4	88	98
19-KP-H4-98-108	118000	4100	5.1193	4	103				19	KP	H4	98	108
19-KP-H4-109-119	221000	4910	4.9968	4	114				19	KP	H4	109	119
19-KP-H4-119-128	120000	4090	5.0515	4	123.5				19	KP	H4	119	128
19-KP-H4-119-128	48700	2980	5.0329	4	123.5				19	KP	H4	119	128
19-KP-H4-128-137	142000	4270	4.9166	4	132.5				19	KP	H4	128	137
19-KP-H4-128-137	61700	3870	4.9803	4	132.5				19	KP	H4	128	137
19-KP-H5-0-10	173000	5890	5.085	5	5				19	KP	H5	0	10
19-KP-H5-61-71	144000	4290	5.0267	5	66				19	KP	H5	61	71
19-KP-H5-120-128	201000	5340	5.1177	5	124				19	KP	H5	120	128
19-KP-H5-120-128	109000	4480	5.0047	5	124				19	KP	H5	120	128
Surface sample data:
Paste greenish and bluish blocks into appropriate place in 'init_C14_data.m'.
Sample name	Mq	Total atoms	uncert total ats
19-KP-012-BR	5.0513	576000	8160		'19-KP-012-BR'
19-KP-001-BR	4.9876	416000	7440		'19-KP-001-BR'
19-KP-008-BR	5.0126	565000	8980		'19-KP-008-BR'
19-KP-006-BR	5.1685	730000	11200		'19-KP-006-BR'
19-KP-007-BR	5.4806	515000	7510		'19-KP-007-BR'
19-KP-009-BR	5.0717	582000	8710		'19-KP-009-BR'
19-KP-010-BR	5.0401	450000	6750		'19-KP-010-BR'
19-KP-003-BR	5.0383	571000	9040		'19-KP-003-BR'
19-KP-011-BR	4.9978	682000	10800		'19-KP-011-BR'
KAY-101	5.0096	535000	7650		'KAY-101'
KAY-103	5.2751	596000	9150		'KAY-103'
KAY-105	5.7106	373000	5800		'KAY-105'
KAY-107	4.9665	433000	7020		'KAY-107'
KAY-108	5.1524	576000	9720		'KAY-108'
KAY-110	5.115	503000	7540		'KAY-110'
KAY-109	5.0536	389000	6030		'KAY-109'
KAY-111	5.5534	533000	8610		'KAY-111'
